# Supplementary material for: Antigenicity comparison of SARS‐CoV‐2 Omicron sublineages with other variants contained multiple mutations in RBD
Source: PubMed Central journal article supplement (PMC8994617; doi:10.1002/mco2.130), 2022-04-09

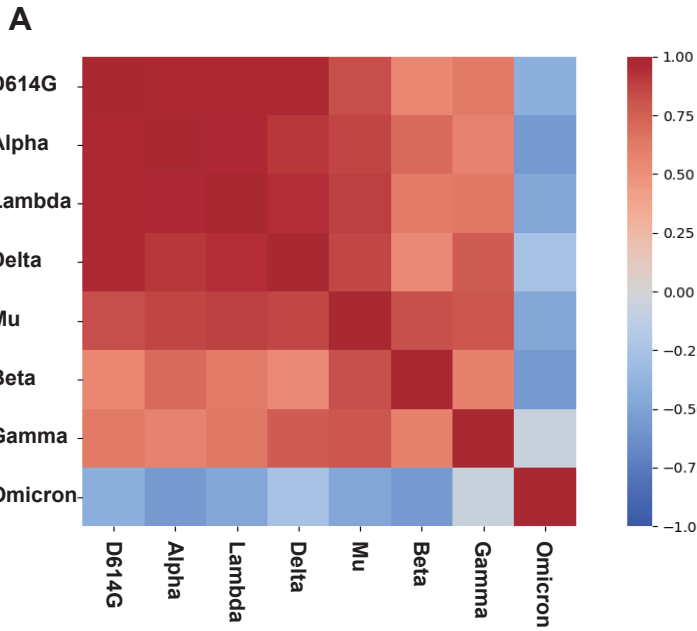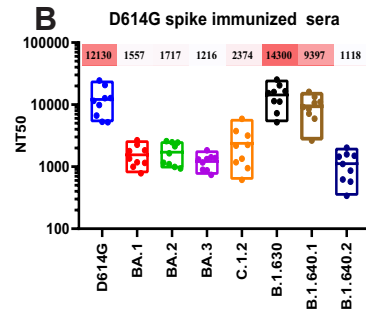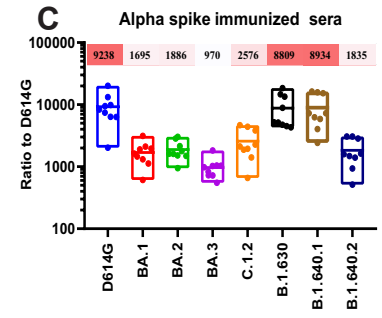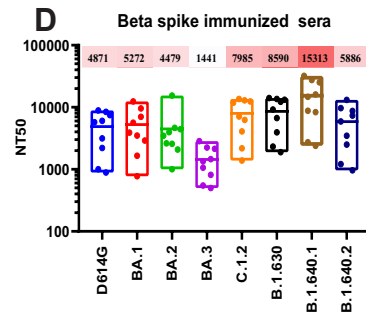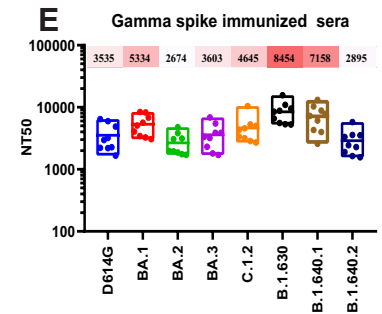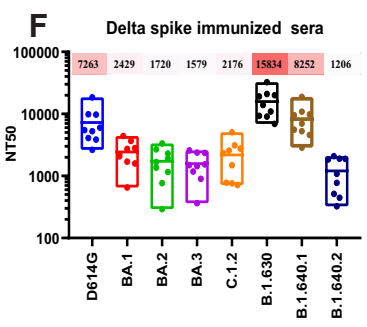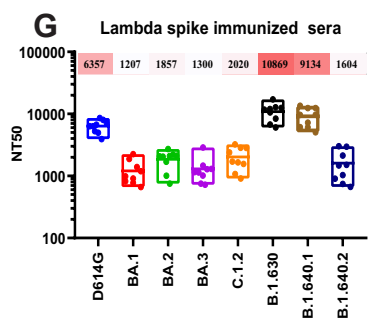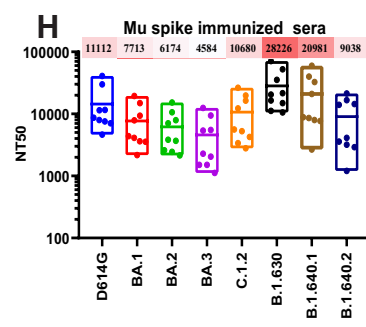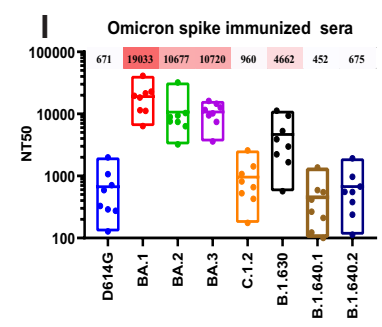

Supplement: MCO2-3-e130-s001.pdf [file MCO2-3-e130-s001.pdf]
